# Supplementary material for: Mitochondrial reactive oxygen species and cancer
Source: Springer Nature journal article supplement (doi:10.1186/2049-3002-2-17), 2014-11-28
Supplement: 40170_2014_138_MOESM6_ESM.pdf [file 40170_2014_138_MOESM6_ESM.pdf]

# Normal Cells

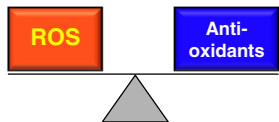

Suppression of ROS production  
or antioxidant treatment →

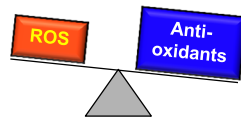

*Homeostasis*

Antioxidant suppression  
or ROS induction →

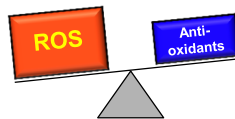

*Homeostasis*

# Cancer Cells

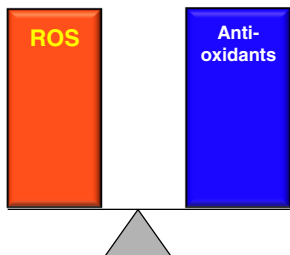

Suppression of ROS production  
or antioxidant treatment →

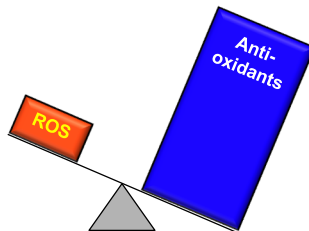

*Cytostasis*

Antioxidant suppression  
or ROS induction →

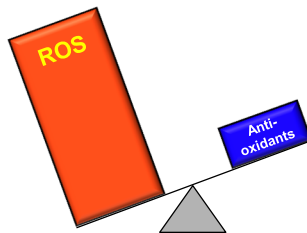

*Oxidative  
Cell Death*
