# Supplementary figures and images for: Mitochondrial reactive oxygen species and cancer
Source: Springer Nature journal article supplement (doi:10.1186/2049-3002-2-17), 2014-11-28

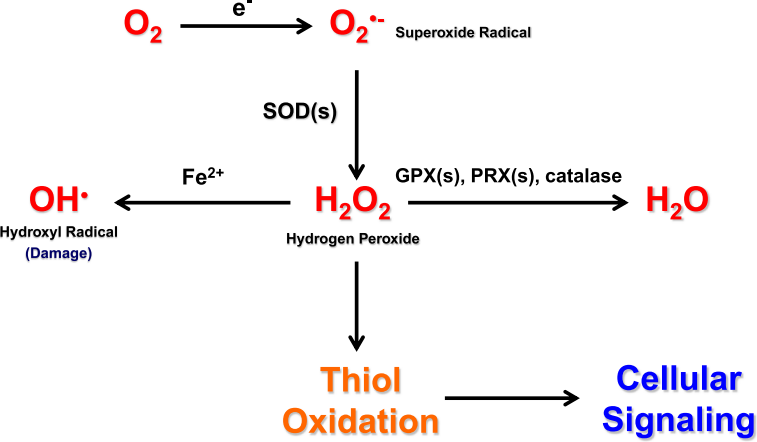

Supplement: 40170_2014_138_MOESM1_ESM.pdf [file 40170_2014_138_MOESM1_ESM.pdf]

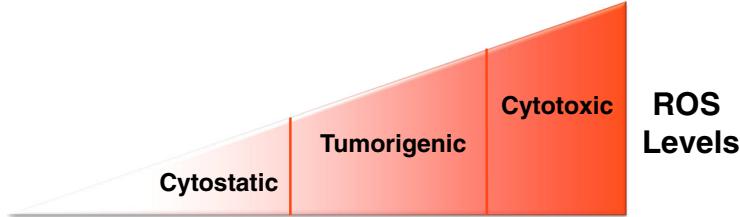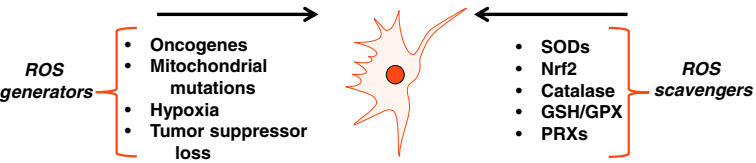

Supplement: 40170_2014_138_MOESM2_ESM.pdf [file 40170_2014_138_MOESM2_ESM.pdf]

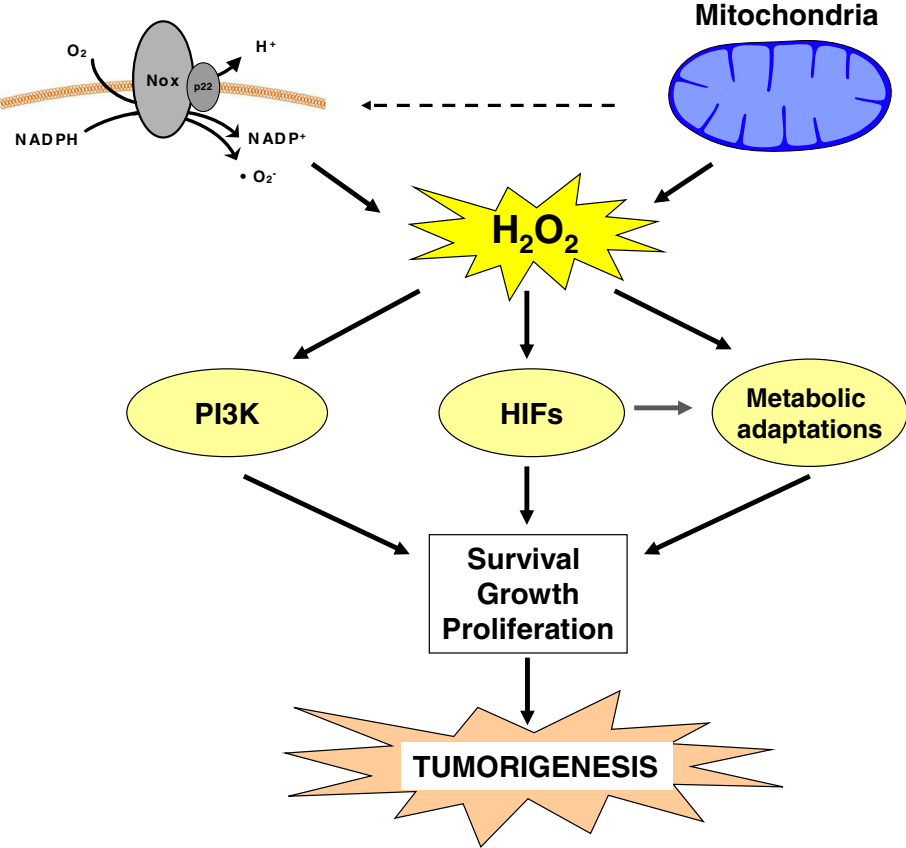

Supplement: 40170_2014_138_MOESM3_ESM.pdf [file 40170_2014_138_MOESM3_ESM.pdf]

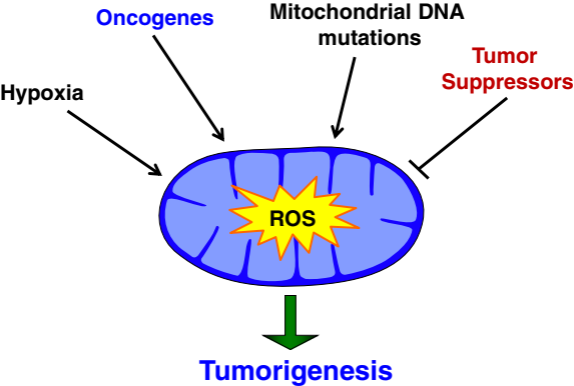

Supplement: 40170_2014_138_MOESM4_ESM.pdf [file 40170_2014_138_MOESM4_ESM.pdf]

**Tumorigenicity**

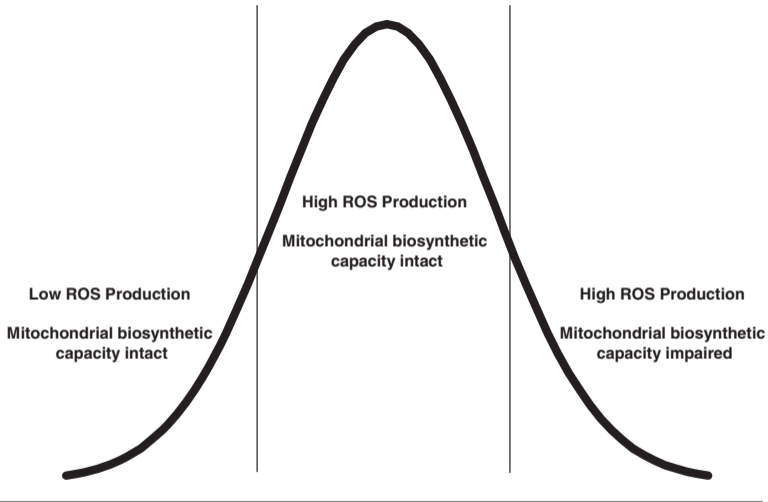

**Mitochondrial DNA mutations**

Supplement: 40170_2014_138_MOESM5_ESM.pdf [file 40170_2014_138_MOESM5_ESM.pdf]
